# Supplementary material
Source: HighWire-hosted journal article supplement (https://www.ajnr.org/highwire/filestream/66252/field_highwire_adjunct_files/0/18-01039.pdf)
Supplement: 18-01039.pdf [file 18-01039.pdf]

**On-line Table 1: Baseline characteristics<sup>a</sup>**

| Characteristics                                     |               |
|-----------------------------------------------------|---------------|
| Age (median) (range) (yr)                           | 63 (32–90)    |
| Male sex (No.) (%)                                  | 59 (72.8%)    |
| Risk factors (No.) (%)                              |               |
| Hypertension                                        | 53 (65.4%)    |
| Dyslipidemia                                        | 50 (61.7%)    |
| Diabetes                                            | 15 (18.5%)    |
| Smoking                                             | 36 (46.4%)    |
| Atrial fibrillation                                 | 9 (11.1%)     |
| Baseline NIHSS (median) (range)                     | 14 (0–30)     |
| Onset to femoral puncture<br>(median) (range) (min) | 255 (94–1310) |
| Wake-up or unclear time of onset<br>(No.) (%)       | 16 (19.7%)    |
| IV thrombolysis (No.) (%)                           | 40 (49.3%)    |
| Initial imaging                                     |               |
| MRI                                                 | 80 (98.7%)    |
| CT                                                  | 1 (1.2%)      |
| Initial DWI APECTS (No.) (%)                        |               |
| 0–3                                                 | 4 (4.9%)      |
| 4–6                                                 | 12 (14.8%)    |
| 7–10                                                | 65 (80.2%)    |
| Median ASPECTS (range)                              | 8 (2–10)      |
| Proximal lesion (No.) (%)                           |               |
| Dissection                                          | 17 (20.9%)    |
| Atheroma                                            | 63 (77.7%)    |
| Carotid web                                         | 1 (1.2%)      |
| Occlusion                                           | 60 (74.0%)    |
| Stenosis $\geq$ 70%                                 | 21 (25.9%)    |
| Distal occlusion site (No.) (%)                     |               |
| Terminal ICA MCA                                    | 19 (23.4%)    |
| M1                                                  | 39 (48.1%)    |
| MCA M2                                              | 23 (28.3%)    |

<sup>a</sup> All Patients (N = 81).

**On-line Table 2: Thrombectomy procedure and clinical and angiographic outcome<sup>a</sup>**

| Procedure and Outcome                                          |                |
|----------------------------------------------------------------|----------------|
| Treatment approach (No.) (%)                                   |                |
| Antegrade approach (neck first)                                | 68 (83.9%)     |
| Retrograde approach (head first)                               | 13 (16.0%)     |
| Treatment for proximal occlusion (No.) (%)                     |                |
| Stenting                                                       | 77 (95.0%)     |
| Angioplasty                                                    | 1 (1.2%)       |
| No treatment                                                   | 3 (3.7%)       |
| Stents used (n/N) (%)                                          |                |
| Wallstent                                                      | 68/77 (88.3%)  |
| Wallstent and Casper <sup>b</sup>                              | 5/77 (6.4%)    |
| Casper                                                         | 1/77 (1.2%)    |
| Wingspan <sup>c</sup>                                          | 2/77 (2.5%)    |
| Luminex <sup>d</sup>                                           | 1/77 (1.2%)    |
| Treatment for distal occlusion (No.) (%)                       |                |
| Stent retriever                                                | 42 (51.8%)     |
| ADAPT <sup>e</sup> technique                                   | 11 (13.5%)     |
| Combined distal aspiration and stent retriever                 | 19 (23.4%)     |
| Intra-arterial thrombolysis                                    | 3 (3.7%)       |
| None                                                           | 6 (7.4%)       |
| Procedural antiplatelet therapy (No.) (%)                      |                |
| None (in cases without carotid stenting)                       | 4 (4.9%)       |
| Aspirin, 250 mg                                                | 42 (51.8%)     |
| Aspirin, 250 mg, + clopidogrel (Plavix), 300 mg                | 35 (43.2%)     |
| Procedural use of heparin (No.) (%)                            | 16 (19.7%)     |
| Intra-arterial injection of alteplase (Actilyse) (No.) (%)     | 26 (32.0%)     |
| Angiographic outcome                                           |                |
| Femoral puncture to recanalization (min) (median) (range)      | 80 (41–180)    |
| Symptom onset to recanalization (median) (range) (min)         | 361 (162–1415) |
| TICI 2b–3                                                      | 70 (86.4%)     |
| TICI 2c–3                                                      | 45 (55.5%)     |
| Procedural complications (No.) (%)                             |                |
| Persistent embolization to new arterial territory <sup>f</sup> | 6 (7.4%)       |
| Iatrogenic ICA dissection                                      | 2 (2.4%)       |
| Subarachnoid hemorrhage due to wire perforation                | 1 (1.2%)       |
| Subarachnoid hemorrhage due to procedural MCA aneurysm rupture | 1 (1.2%)       |
| Surgery for femoral artery access site complications           | 4 (4.9%)       |
| Imaging outcome (No.) (%)                                      |                |
| Hemorrhagic transformation                                     | 36 (44.4%)     |
| PH 1                                                           | 11 (13.5%)     |
| PH 2                                                           | 8 (9.8%)       |
| Symptomatic ICH                                                | 5 (6.1%)       |
| Clinical outcome at discharge                                  |                |
| NIHSS (median) (range)                                         | 6 (0–19)       |
| Modified Rankin Scale score ≤2 (No.) (%)                       | 35 (43.2%)     |
| In-hospital mortality (all cause) (No.) (%)                    | 8 (9.8%)       |
| Clinical outcome at follow-up (n = 60) <sup>g</sup>            |                |
| Follow-up interval (median) (range) (mo)                       | 10 (1–78)      |
| mRS score ≤2 (n/N) (%)                                         | 37/60 (61.6%)  |

**Note:**—ICH indicates intracerebral hemorrhage; PH, parenchymal hematoma type.

<sup>a</sup> All patients (N = 81).

<sup>b</sup> Casper; MicroVention, Tustin, California.

<sup>c</sup> Stryker, Kalamazoo, Michigan.

<sup>d</sup> Cook, Stouffville, Ontario, Canada.

<sup>e</sup> A Direct Aspiration First Pass Technique (<https://evtoday.com/2016/02/adapt-a-direct-aspiration-first-pass-technique/>).

<sup>f</sup> Persistent embolization to a new arterial territory (ENT) at the end of the procedure, excluding cases where ENT was successfully treated.

<sup>g</sup> For 21 patients, there was no available follow-up after discharge.

**On-line Table 3: Univariate predictors for stent occlusion (subgroup of 73 patients)**

|                                                                  | Stent<br>Patent<br>(n = 59) | Stent<br>Occlusion<br>(n = 14) | OR<br>(95% CI)    | P<br>Value        |
|------------------------------------------------------------------|-----------------------------|--------------------------------|-------------------|-------------------|
| Age (median) (range) (yr)                                        | 66 (32–86)                  | 61 (37–90)                     | NA                | .32               |
| Male sex (No.) (%)                                               | 43 (72.8%)                  | 10 (71.4%)                     | 0.93 (0.25–3.39)  | .93               |
| Hypertension (No.) (%)                                           | 41 (69.4%)                  | 9 (64.2%)                      | 0.79 (0.23–2.69)  | .70               |
| Dyslipidemia (No.) (%)                                           | 38 (64.4%)                  | 7 (50.0%)                      | 0.556 (0.17–1.79) | .31               |
| Diabetes (No.) (%)                                               | 8 (13.5%)                   | 5 (35.7%)                      | 3.54 (0.94–13.30) | .05               |
| Atrial fibrillation (No.) (%)                                    | 7 (11.8%)                   | 1 (7.1%)                       | 0.57 (0.06–5.06)  | .61               |
| Smoking (No.) (%)                                                | 27 (45.7%)                  | 6 (42.8%)                      | 0.88 (0.27–2.88)  | .84               |
| Baseline NIHSS (median) (range)                                  | 12 (0–23)                   | 17.5 (3–30)                    | NA                | .01 <sup>a</sup>  |
| Symptom onset to femoral puncture (median) (range) (min)         | 251 (94–760)                | 352 (138–1283)                 | NA                | .1                |
| IV thrombolysis (No.) (%)                                        | 31 (52.5%)                  | 4 (28.5%)                      | 0.36 (0.10–1.28)  | .10               |
| Initial DWI APECTS <7 (No.) (%)                                  | 9 (15.2%)                   | 5 (35.7%)                      | 3.08 (0.83–11.37) | .08               |
| Proximal lesion occlusion (No.) (%)                              | 42 (71.1%)                  | 10 (71.4%)                     | 1.01 (0.27–3.67)  | .98               |
| Etiology of proximal lesion, dissection (No.) (%)                | 11 (18.6%)                  | 3 (21.4%)                      | 1.19 (0.28–4.99)  | .81               |
| Cervical thrombus distal to proximal occlusion (No.) (%)         | 14 (23.7%)                  | 7 (50.0%)                      | 3.2 (0.96–10.75)  | .05               |
| Distal occlusion site (No.) (%)                                  |                             |                                |                   |                   |
| Terminal ICA                                                     | 15 (25.4%)                  | 2 (14.2%)                      | 0.48 (0.09–2.44)  | .37               |
| MCA M1                                                           | 27 (45.7%)                  | 9 (64.2%)                      | 2.13 (0.63–7.13)  | .21               |
| MCA M2                                                           | 17 (28.8%)                  | 3 (21.4%)                      | 0.67 (0.16–2.72)  | .57               |
| Treatment approach, retrograde (head first) (No.) (%)            | 8 (13.5%)                   | 2 (14.2%)                      | 1.06 (0.19–5.65)  | .94               |
| Treatment for distal occlusion (No.) (%)                         |                             |                                |                   |                   |
| Stent retriever                                                  | 35 (59.3%)                  | 7 (50.0%)                      | 0.68 (0.21–2.20)  | .52               |
| ADAPT technique                                                  | 9 (15.2%)                   | 2 (14.2%)                      | 0.92 (0.17–4.85)  | .92               |
| Combined distal aspiration and stent retriever                   | 12 (20.3%)                  | 3 (21.4%)                      | 1.06 (0.25–4.44)  | .92               |
| In-stent thrombus on final angiographic run (No.) (%)            | 10 (16.9%)                  | 7 (50.0%)                      | 4.9 (1.40–17.09)  | .008 <sup>a</sup> |
| Multiple stents (No.) (%)                                        | 21 (35.5%)                  | 5 (35.7%)                      | 1.00 (0.29–3.39)  | .99               |
| Presence of ipsilateral intracranial ICA stenosis ≥50% (No.) (%) | 4 (6.7%)                    | 2 (14.2%)                      | 2.29 (0.37–13.99) | .35               |
| Presence of contralateral ICA stenosis ≥50% (No.) (%)            | 5 (8.4%)                    | 2 (14.2%)                      | 1.80 (0.31–10.42) | .50               |
| Procedural antiplatelet/anticoagulant therapy (No.) (%)          |                             |                                |                   |                   |
| Aspirin and clopidogrel                                          | 31 (52.5%)                  | 3 (21.4%)                      | 1 (ref.)          |                   |
| Only aspirin                                                     | 28 (47.4%)                  | 11 (78.5%)                     | 4.06 (1.02–16.06) | .03 <sup>a</sup>  |
| Heparin use (No.) (%)                                            | 14 (23.7%)                  | 1 (7.1%)                       | 0.24 (0.02–2.0)   | .16               |
| Angiographic outcome                                             |                             |                                |                   |                   |
| Femoral puncture to recanalization (median) (range) (min)        | 80 (41–152)                 | 86 (55–156)                    | NA                | .18               |
| Onset to recanalization (median) (range) (min)                   | 354 (162–846)               | 446 (205–1410)                 | NA                | .08               |
| TICI 2a (No.) (%)                                                | 5 (8.4%)                    | 0 (0%)                         | 1 (ref.)          |                   |
| TICI 2b (No.) (%)                                                | 19 (32.2%)                  | 5 (35.7%)                      | 1.17 (0.34–3.97)  | .80               |
| TICI 2c–3 (No.) (%)                                              | 35 (59.3%)                  | 9 (64.2%)                      | 1.23 (0.36–4.14)  | .73               |

**Note:**—NA indicates not applicable; ref., reference.

<sup>a</sup> Significant.

**On-line Table 4: Univariate predictors for good clinical outcome at discharge (mRS score  $\leq 2$ ) in the stent-analysis subgroup (73 patients)**

|                                                                         | Unfavorable Outcome<br>(n = 39) | Good Outcome<br>(n = 34) | OR<br>(95% CI)    | P Value             |
|-------------------------------------------------------------------------|---------------------------------|--------------------------|-------------------|---------------------|
| Age (median) (range) (yr)                                               | 65 (32–90)                      | 63.5 (42–84)             | NA                | .63                 |
| Male sex (No.) (%)                                                      | 28 (71.8%)                      | 25 (73.5%)               | 1.1 (0.39–3.1)    | .55                 |
| Hypertension (No.) (%)                                                  | 29 (74.3%)                      | 21 (61.7%)               | 0.56 (0.21–1.5)   | .24                 |
| Dyslipidemia (No.) (%)                                                  | 23 (58.9%)                      | 22 (64.7%)               | 1.3 (0.49–3.3)    | .61                 |
| Diabetes (No.) (%)                                                      | 8 (20.5%)                       | 5 (14.7%)                | 0.67 (0.2–2.3)    | .51                 |
| Atrial fibrillation (No.) (%)                                           | 4 (10.2%)                       | 4 (11.7%)                | 1.2 (0.27–5.1)    | .83                 |
| Smoking (No.) (%)                                                       | 17 (43.5%)                      | 16 (47.0%)               | 1.2 (0.46–2.9)    | .76                 |
| Baseline NIHSS (median) (range)                                         | 16 (0–30)                       | 10 (0–20)                | NA                | <.0001 <sup>a</sup> |
| Symptom onset to femoral puncture (median) (range) (min)                | 320 (94–1283)                   | 226 (108–946)            | NA                | .02 <sup>a</sup>    |
| IV thrombolysis (No.) (%)                                               | 19 (48.7%)                      | 16 (47.0%)               | 0.94 (0.37–2.4)   | .88                 |
| Initial DWI APECTS <7 (No.) (%)                                         | 11 (28.2%)                      | 3 (8.8%)                 | 0.25 (0.06–0.97)  | .03 <sup>a</sup>    |
| Proximal lesion, occlusion (No.) (%)                                    | 27 (69.2%)                      | 25 (73.5%)               | 1.2 (0.44–3.4)    | .68                 |
| Etiology of proximal lesion, dissection (No.) (%)                       | 7 (17.9%)                       | 7 (20.5%)                | 1.2 (0.27–3.8)    |                     |
| Cervical thrombus distal to proximal occlusion (No.) (%)                | 15 (38.4%)                      | 6 (17.6%)                | 0.34 (0.11–1.0)   | .77                 |
| Distal occlusion site (No.) (%)                                         |                                 |                          |                   |                     |
| Terminal ICA                                                            | 12 (30.7%)                      | 5 (14.7%)                | 1.0 (ref.)        | .05                 |
| MCA M1                                                                  | 21 (53.8%)                      | 15 (44.1%)               | 0.68 (0.27–1.7)   | .4                  |
| MCA M2                                                                  | 6 (15.3%)                       | 14 (41.1%)               | 3.9 (1.3–12.0)    | .01 <sup>a</sup>    |
| Treatment approach, retrograde approach (head first) (No.) (%)          | 5 (12.8%)                       | 5 (14.7%)                | 1.2 (0.31–4.5)    | .81                 |
| Treatment for distal occlusion (No.) (%)                                |                                 |                          |                   |                     |
| Stent retriever                                                         | 23 (58.9%)                      | 19 (55.8%)               | 1.0 (ref.)        | .56                 |
| ADAPT technique                                                         | 5 (12.8%)                       | 6 (17.6%)                | 1.5 (0.4–5.3)     | .56                 |
| Combined distal aspiration and stent retriever                          | 9 (23.0%)                       | 6 (17.6%)                | 0.71 (0.23–2.3)   | .63                 |
| Spontaneous recanalization                                              | 2 (5.1%)                        | 1 (2.9%)                 | 0.56 (0.04–6.5)   |                     |
| Presence of ipsilateral intracranial ICA stenosis $\geq 50\%$ (No.) (%) | 3 (7.6%)                        | 3 (8.8%)                 | 1.2 (0.22–6.2)    | .86                 |
| Presence of contralateral ICA stenosis $\geq 50\%$ (No.) (%)            | 3 (7.6%)                        | 4 (11.7%)                | 1.6 (0.33–7.7)    | .55                 |
| Procedural antiplatelet therapy (No.) (%)                               |                                 |                          |                   |                     |
| Only aspirin                                                            | 22 (56.4%)                      | 17 (50.0%)               | 1.0 (ref.)        | .58                 |
| Aspirin and clopidogrel                                                 | 17 (43.5%)                      | 17 (50.0%)               | 1.3 (0.51–3.3)    |                     |
| Heparin use (No.) (%)                                                   | 10 (25.6%)                      | 5 (14.7%)                | 0.5 (0.15–1.6)    | .24                 |
| Angiographic outcome                                                    |                                 |                          |                   |                     |
| Femoral puncture to recanalization (median) (range) (min)               | 86 (43–156)                     | 74 (41–152)              | NA                | .13                 |
| Onset-recanalization (median) (range) (min)                             | 403 (190–1410)                  | 316 (162–1024)           | NA                | .01 <sup>a</sup>    |
| TICI 2a (No.) (%)                                                       | 3 (7.6%)                        | 2 (5.8%)                 | 1.0 (ref.)        | .68                 |
| TICI 2b (No.) (%)                                                       | 12 (30.7%)                      | 12 (35.2%)               | 1.2 (0.46–3.3)    | .81                 |
| TICI 2c–3 (No.) (%)                                                     | 24 (61.5%)                      | 20 (58.8%)               | 0.89 (0.35–2.3)   |                     |
| Stent occlusion (No.) (%)                                               | 13 (33.3%)                      | 1 (2.9%)                 | 0.06 (0.007–0.49) | .001 <sup>a</sup>   |
| Symptomatic hemorrhagic transformation (No.) (%)                        | 5 (12.8%)                       | 0 (0%)                   | 0.09 (0.04–1.7)   | .03 <sup>a</sup>    |

**Note:**—NA indicates not applicable; ref., reference.

<sup>a</sup> Significant.
